# Supplementary material for: Altered intestinal functions and increased local inflammation in insulin-resistant obese subjects: a gene-expression profile analysis
Source: Springer Nature journal article supplement (doi:10.1186/s12876-015-0342-y), 2015-09-16
Supplement: MOESM1 [file 9738310]

**Supplementary Table 1:** Complete list of the 195 annotated differentially expressed genes in the intestine of insulin-resistant compared to insulin-sensitive subjects (Fold change > 1.2, P < 0.05).

| <b>Symbol</b>   | <b>Fold Change</b> | <b>Illumina</b> | <b>Entrez Gene ID</b> |
|-----------------|--------------------|-----------------|-----------------------|
| <i>ACAA1</i>    | -1,233             | ILMN_1738921    | 30                    |
| <i>ACSL5</i>    | -1,225             | ILMN_2370882    | 51703                 |
| <i>ACY1</i>     | -1,228             | ILMN_1683883    | 95                    |
| <i>ADA</i>      | -1,218             | ILMN_1803686    | 100                   |
| <i>ADAMDEC1</i> | 1,224              | ILMN_1716909    | 27299                 |
| <i>ADH4</i>     | -1,211             | ILMN_2136010    | 127                   |
| <i>ADTRP</i>    | 1,218              | ILMN_2078592    | 84830                 |
| <i>AGO2</i>     | -1,243             | ILMN_1695719    | 27161                 |
| <i>AGPAT9</i>   | -1,332             | ILMN_1794875    | 84803                 |
| <i>AGR2</i>     | 1,278              | ILMN_1814151    | 10551                 |
| <i>ALAS2</i>    | 1,303              | ILMN_2367126    | 212                   |
| <i>ALDH3A1</i>  | -1,213             | ILMN_1702503    | 218                   |
| <i>AOC1</i>     | -1,379             | ILMN_1731433    | 26                    |
| <i>APOA1</i>    | -1,373             | ILMN_1690884    | 335                   |
| <i>APOD</i>     | 1,203              | ILMN_1780170    | 347                   |
| <i>AQP11</i>    | -1,278             | ILMN_1762606    | 282679                |
| <i>AQP2</i>     | -1,210             | ILMN_1732149    | 359                   |
| <i>ARL4A</i>    | 1,229              | ILMN_1775405    | 10124                 |
| <i>ARPC4</i>    | 1,244              | ILMN_2393763    | 10093                 |
| <i>ATF3</i>     | 1,402              | ILMN_2374865    | 467                   |
| <i>BIRC3</i>    | 1,202              | ILMN_1776181    | 330                   |
| <i>BRI3BP</i>   | -1,226             | ILMN_1797693    | 140707                |
| <i>BTG2</i>     | 1,256              | ILMN_1770085    | 7832                  |
| <i>C15orf48</i> | -1,391             | ILMN_1805410    | 84419                 |
| <i>C8orf4</i>   | 1,302              | ILMN_1656369    | 56892                 |
| <i>CALD1</i>    | -1,224             | ILMN_1717990    | 800                   |
| <i>CASP7</i>    | -1,206             | ILMN_2373763    | 840                   |
| <i>CCBE1</i>    | -1,205             | ILMN_2122511    | 147372                |
| <i>CD55</i>     | 1,213              | ILMN_1800540    | 1604                  |
| <i>CD79B</i>    | 1,203              | ILMN_2366212    | 974                   |
| <i>CDH17</i>    | -1,221             | ILMN_1814015    | 1015                  |
| <i>CDHR2</i>    | -1,367             | ILMN_1718173    | 54825                 |
| <i>CDK11A/B</i> | -1,316             | ILMN_2330552    | 728642;984            |
| <i>CEACAM5</i>  | -1,243             | ILMN_1670959    | 1048                  |
| <i>CEACAM6</i>  | -1,291             | ILMN_1712522    | 4680                  |
| <i>CELA3A</i>   | 1,223              | ILMN_1677559    | 10136                 |
| <i>CES2</i>     | -1,297             | ILMN_2362681    | 8824                  |
| <i>CFB</i>      | -1,204             | ILMN_1774287    | 629                   |
| <i>CLCA1</i>    | -1,250             | ILMN_1797219    | 1179                  |
| <i>CLDN18</i>   | -1,279             | ILMN_1696284    | 51208                 |

|                |        |              |           |
|----------------|--------|--------------|-----------|
| <i>CLK1</i>    | 1,230  | ILMN_1679727 | 1195      |
| <i>CNN1</i>    | 1,257  | ILMN_1810054 | 1264      |
| <i>COL17A1</i> | -1,250 | ILMN_1651282 | 1308      |
| <i>COX7A1</i>  | 1,212  | ILMN_1662419 | 1346      |
| <i>CREB1</i>   | -1,225 | ILMN_2334242 | 1385      |
| <i>CREB3L3</i> | -1,320 | ILMN_1779524 | 84699     |
| <i>CRIP1</i>   | -1,329 | ILMN_1656920 | 1396      |
| <i>CSF3R</i>   | 1,246  | ILMN_2371280 | 1441      |
| <i>CSRNP1</i>  | 1,251  | ILMN_1703123 | 64651     |
| <i>CSRP2</i>   | 1,244  | ILMN_1660806 | 1466      |
| <i>CTGF</i>    | 1,338  | ILMN_2115125 | 1490      |
| <i>CXCR4</i>   | 1,311  | ILMN_1801584 | 7852      |
| <i>CYP2S1</i>  | -1,214 | ILMN_1705403 | 29785     |
| <i>CYR61</i>   | 1,252  | ILMN_2188264 | 3491      |
| <i>DCN</i>     | 1,238  | ILMN_1768227 | 1634      |
| <i>DUSP1</i>   | 1,366  | ILMN_1781285 | 1843      |
| <i>E2F2</i>    | -1,270 | ILMN_1777233 | 1870      |
| <i>EDN3</i>    | -1,210 | ILMN_2358886 | 1908      |
| <i>EGR1</i>    | 1,358  | ILMN_1762899 | 1958      |
| <i>ERH</i>     | 1,227  | ILMN_1781795 | 2079      |
| <i>FABP2</i>   | -1,258 | ILMN_1740479 | 2169      |
| <i>FAM107A</i> | 1,234  | ILMN_1743445 | 11170     |
| <i>FAM118A</i> | 1,358  | ILMN_1809147 | 55007     |
| <i>FBXO2</i>   | -1,213 | ILMN_1803211 | 26232     |
| <i>FBXO6</i>   | -1,222 | ILMN_1701455 | 26270     |
| <i>FCGBP</i>   | -1,303 | ILMN_1718984 | 8857      |
| <i>FKBP5</i>   | 1,385  | ILMN_1778444 | 2289      |
| <i>FOS</i>     | 1,546  | ILMN_1669523 | 2353      |
| <i>FOSB</i>    | 1,429  | ILMN_1751607 | 2354      |
| <i>FXR1</i>    | 1,219  | ILMN_1679640 | 8087      |
| <i>GADD45B</i> | 1,262  | ILMN_1718977 | 4616      |
| <i>GC</i>      | 1,455  | ILMN_1736162 | 2638      |
| <i>GEM</i>     | 1,255  | ILMN_2367883 | 2669      |
| <i>GIP</i>     | -1,723 | ILMN_1673805 | 2695      |
| <i>GNL3L</i>   | -1,356 | ILMN_1708414 | 54552     |
| <i>GOLM1</i>   | 1,232  | ILMN_1737011 | 51280     |
| <i>GP2</i>     | 1,382  | ILMN_2311873 | 2813      |
| <i>GPX8</i>    | 1,206  | ILMN_1767665 | 493869    |
| <i>GSTT1</i>   | 1,832  | ILMN_1730054 | 2952      |
| <i>GZMA</i>    | -1,275 | ILMN_1779324 | 3001      |
| <i>H1FO</i>    | 1,232  | ILMN_1757467 | 3005      |
| <i>HBA1/2</i>  | 1,932  | ILMN_3240144 | 3040;3039 |
| <i>HBB</i>     | 1,668  | ILMN_2100437 | 3043      |
| <i>HBEGF</i>   | 1,214  | ILMN_2121408 | 1839      |
| <i>HDC</i>     | -1,222 | ILMN_1792323 | 3067      |

|                 |        |              |        |
|-----------------|--------|--------------|--------|
| <i>HLA-A</i>    | 2,631  | ILMN_2165753 | 3105   |
| <i>HLA-C</i>    | -1,202 | ILMN_1721113 | 3107   |
| <i>HLA-DQA1</i> | 1,378  | ILMN_1808405 | 3117   |
| <i>HLA-DQB1</i> | 1,223  | ILMN_1661266 | 3119   |
| <i>HLA-DRB1</i> | -1,351 | ILMN_1715169 | 3123   |
| <i>HLA-DRB4</i> | 1,391  | ILMN_1752592 | 3126   |
| <i>HLA-F</i>    | -1,275 | ILMN_1762861 | 3134   |
| <i>HMGCS1</i>   | 1,240  | ILMN_1797728 | 3157   |
| <i>HSH2D</i>    | -1,210 | ILMN_1788017 | 84941  |
| <i>IFI35</i>    | -1,203 | ILMN_1745374 | 3430   |
| <i>IL1B</i>     | 1,212  | ILMN_1775501 | 3553   |
| <i>INF2</i>     | -1,209 | ILMN_2393450 | 64423  |
| <i>INSIG1</i>   | 1,298  | ILMN_1793474 | 3638   |
| <i>IRAK3</i>    | 1,233  | ILMN_1913678 | 11213  |
| <i>JUN</i>      | 1,320  | ILMN_1806023 | 3725   |
| <i>KLF6</i>     | 1,202  | ILMN_1735014 | 1316   |
| <i>KLF9</i>     | 1,234  | ILMN_1778523 | 687    |
| <i>KLRB1</i>    | 1,211  | ILMN_2079655 | 3820   |
| <i>LAMB3</i>    | -1,276 | ILMN_1715684 | 3914   |
| <i>LCT</i>      | 1,539  | ILMN_2046073 | 3938   |
| <i>LDLR</i>     | 1,295  | ILMN_2053415 | 3949   |
| <i>LEAP2</i>    | -1,202 | ILMN_2124361 | 116842 |
| <i>LRRC17</i>   | 1,207  | ILMN_1652826 | 10234  |
| <i>MAF</i>      | -1,287 | ILMN_1719543 | 4094   |
| <i>MAPK13</i>   | -1,226 | ILMN_1749327 | 5603   |
| <i>MED4</i>     | -1,236 | ILMN_1664641 | 29079  |
| <i>MEG3</i>     | 1,201  | ILMN_2061435 | 55384  |
| <i>MEP1A</i>    | -1,260 | ILMN_1659984 | 4224   |
| <i>MGP</i>      | 1,218  | ILMN_2071809 | 4256   |
| <i>MLN</i>      | -1,234 | ILMN_1685858 | 4295   |
| <i>MMP7</i>     | 1,273  | ILMN_1685403 | 4316   |
| <i>MSMB</i>     | -1,803 | ILMN_1699243 | 4477   |
| <i>MUC2</i>     | -1,321 | ILMN_2205622 | 4583   |
| <i>MUC5AC</i>   | -1,575 | ILMN_1748303 | 4586   |
| <i>MUC6</i>     | 1,212  | ILMN_1727875 | 4588   |
| <i>MVP</i>      | -1,244 | ILMN_1803277 | 9961   |
| <i>MYL12A</i>   | -1,216 | ILMN_1675848 | 10627  |
| <i>MYL9</i>     | 1,217  | ILMN_1776953 | 10398  |
| <i>NBPF10</i>   | -1,436 | ILMN_2115490 | 55672  |
| <i>NEXN</i>     | 1,213  | ILMN_1783276 | 91624  |
| <i>NFIC</i>     | -1,202 | ILMN_1675130 | 4782   |
| <i>NGFRAP1</i>  | 1,243  | ILMN_2370091 | 27018  |
| <i>NPIP15</i>   | 1,266  | ILMN_2147105 | 728741 |
| <i>OPA3</i>     | -1,258 | ILMN_2284591 | 80207  |
| <i>PARP12</i>   | -1,208 | ILMN_1718558 | 64761  |

|                 |        |              |        |
|-----------------|--------|--------------|--------|
| <i>PCK2</i>     | -1,273 | ILMN_1671791 | 5106   |
| <i>PK4</i>      | 1,314  | ILMN_1684982 | 5166   |
| <i>PEBP1</i>    | -1,212 | ILMN_1688089 | 5037   |
| <i>PGA5</i>     | -1,970 | ILMN_1717572 | 643834 |
| <i>PJA2</i>     | 1,361  | ILMN_1688702 | 9867   |
| <i>PLIN2</i>    | -1,255 | ILMN_1801077 | 123    |
| <i>PNLIPRP2</i> | 1,297  | ILMN_1712613 | 5408   |
| <i>PRELID1</i>  | -1,238 | ILMN_2179652 | 27166  |
| <i>PRKARIA</i>  | 1,202  | ILMN_2389590 | 5573   |
| <i>PRSS1</i>    | 1,236  | ILMN_1734773 | 5644   |
| <i>PTGS2</i>    | 1,202  | ILMN_2054297 | 5743   |
| <i>PTK6</i>     | -1,213 | ILMN_2075800 | 5753   |
| <i>RARRES2</i>  | 1,232  | ILMN_1810844 | 5919   |
| <i>RDH5</i>     | -1,206 | ILMN_1773395 | 5959   |
| <i>REG1B</i>    | -1,537 | ILMN_1681462 | 5968   |
| <i>REG4</i>     | -1,252 | ILMN_2169383 | 83998  |
| <i>RERGL</i>    | 1,281  | ILMN_3243185 | 79785  |
| <i>RETSAT</i>   | -1,207 | ILMN_1702633 | 54884  |
| <i>RGS1</i>     | 1,252  | ILMN_1656011 | 5996   |
| <i>RNASE1</i>   | 1,339  | ILMN_2333670 | 6035   |
| <i>RPL17</i>    | 1,285  | ILMN_1655422 | 6139   |
| <i>RPS23</i>    | 1,262  | ILMN_1772459 | 6228   |
| <i>RPS4Y1</i>   | 1,266  | ILMN_1783142 | 6192   |
| <i>S100A8</i>   | 1,586  | ILMN_1729801 | 6279   |
| <i>S100A9</i>   | 1,510  | ILMN_1750974 | 6280   |
| <i>S100P</i>    | -1,322 | ILMN_1801216 | 6286   |
| <i>SCGB3A1</i>  | -1,286 | ILMN_1679666 | 92304  |
| <i>SCIN</i>     | -1,227 | ILMN_1813561 | 85477  |
| <i>SDCBP2</i>   | -1,253 | ILMN_1705107 | 27111  |
| <i>SERPINA3</i> | 1,300  | ILMN_1788874 | 12     |
| <i>SIK1</i>     | 1,218  | ILMN_3235647 | 150094 |
| <i>SLC22A18</i> | -1,225 | ILMN_2382505 | 5002   |
| <i>SLC28A2</i>  | -1,683 | ILMN_1801886 | 9153   |
| <i>SLC2A3</i>   | 1,254  | ILMN_1775708 | 6515   |
| <i>SLC2A5</i>   | -1,249 | ILMN_1671337 | 6518   |
| <i>SLC35G1</i>  | -1,221 | ILMN_1690464 | 159371 |
| <i>SPARCL1</i>  | 1,294  | ILMN_1795251 | 8404   |
| <i>STMN2</i>    | 1,209  | ILMN_1795679 | 11075  |
| <i>SUSD2</i>    | -1,238 | ILMN_1693270 | 56241  |
| <i>TFF1</i>     | -1,445 | ILMN_1722489 | 7031   |
| <i>TFG</i>      | -1,227 | ILMN_2341815 | 10342  |
| <i>THBS1</i>    | 1,207  | ILMN_1686116 | 7057   |
| <i>THNSL2</i>   | 1,270  | ILMN_2173294 | 55258  |
| <i>TIMM10</i>   | -1,255 | ILMN_1765332 | 26519  |
| <i>TMEM176A</i> | -1,227 | ILMN_1791511 | 55365  |

|                |        |              |        |
|----------------|--------|--------------|--------|
| <i>TOP3A</i>   | -1,224 | ILMN_2072973 | 7156   |
| <i>TRIM15</i>  | -1,365 | ILMN_1754476 | 89870  |
| <i>TRIM31</i>  | -1,515 | ILMN_1748685 | 11074  |
| <i>TRPV6</i>   | -1,233 | ILMN_1674533 | 55503  |
| <i>TSC22D1</i> | 1,286  | ILMN_1692177 | 8848   |
| <i>TSC22D3</i> | 1,285  | ILMN_1748124 | 1831   |
| <i>UGT2B15</i> | 1,221  | ILMN_2048414 | 7366   |
| <i>VAV3</i>    | -1,272 | ILMN_2399463 | 10451  |
| <i>VCAM1</i>   | 1,266  | ILMN_2307903 | 7412   |
| <i>VIL1</i>    | -1,215 | ILMN_1661750 | 7429   |
| <i>VIP</i>     | 1,302  | ILMN_2357542 | 7432   |
| <i>VRK3</i>    | -1,209 | ILMN_1771697 | 51231  |
| <i>WDR72</i>   | 1,306  | ILMN_1763196 | 256764 |
| <i>WWP1</i>    | 1,203  | ILMN_1804328 | 11059  |
| <i>YY1</i>     | -1,254 | ILMN_1770892 | 7528   |
| <i>ZAK</i>     | 1,223  | ILMN_1768110 | 51776  |
| <i>ZBTB16</i>  | 1,232  | ILMN_2305407 | 7704   |
| <i>ZFAND2A</i> | -1,256 | ILMN_1694671 | 90637  |
| <i>ZFP36</i>   | 1,408  | ILMN_1720829 | 7538   |
| <i>ZG16</i>    | -1,443 | ILMN_2121774 | 653808 |

**Supplementary Table 2:** List of the GO terms significantly enriched in differentially expressed genes in the intestine of insulin-resistant compared to insulin-sensitive subjects (FDR < 10<sup>-5</sup>).

| GO terms | Description                                  | P values              | FDR q-value           |
|----------|----------------------------------------------|-----------------------|-----------------------|
| 0042221  | response to chemical                         | 1,2x10 <sup>-12</sup> | 1,7x10 <sup>-08</sup> |
| 0002682  | regulation of immune system process          | 4,4x10 <sup>-12</sup> | 3,0x10 <sup>-08</sup> |
| 0007586  | digestion                                    | 7,9x10 <sup>-12</sup> | 3,6x10 <sup>-08</sup> |
| 0006950  | response to stress                           | 1,3x10 <sup>-11</sup> | 4,5x10 <sup>-08</sup> |
| 0010941  | regulation of cell death                     | 1,7x10 <sup>-11</sup> | 4,8x10 <sup>-08</sup> |
| 0042981  | regulation of apoptotic process              | 3,4x10 <sup>-11</sup> | 7,9x10 <sup>-08</sup> |
| 0043067  | regulation of programmed cell death          | 4,6x10 <sup>-11</sup> | 8,9x10 <sup>-08</sup> |
| 0009991  | response to extracellular stimulus           | 8,0x10 <sup>-11</sup> | 1,4x10 <sup>-07</sup> |
| 0008152  | metabolic process                            | 9,7x10 <sup>-11</sup> | 1,5x10 <sup>-07</sup> |
| 0010035  | response to inorganic substance              | 1,5x10 <sup>-10</sup> | 2,1x10 <sup>-07</sup> |
| 0050896  | response to stimulus                         | 3,1x10 <sup>-10</sup> | 3,8x10 <sup>-07</sup> |
| 0044238  | primary metabolic process                    | 4,8x10 <sup>-10</sup> | 5,5x10 <sup>-07</sup> |
| 0010033  | response to organic substance                | 7,7x10 <sup>-10</sup> | 8,1x10 <sup>-07</sup> |
| 0010942  | positive regulation of cell death            | 1,6x10 <sup>-09</sup> | 1,6x10 <sup>-06</sup> |
| 0031667  | response to nutrient levels                  | 2,1x10 <sup>-09</sup> | 1,9x10 <sup>-06</sup> |
| 0009605  | response to external stimulus                | 2,4x10 <sup>-09</sup> | 2,0x10 <sup>-06</sup> |
| 0071704  | organic substance metabolic process          | 4,0x10 <sup>-09</sup> | 3,2x10 <sup>-06</sup> |
| 0002376  | immune system process                        | 5,6x10 <sup>-09</sup> | 4,2x10 <sup>-06</sup> |
| 0044710  | single-organism metabolic process            | 7,5x10 <sup>-09</sup> | 5,4x10 <sup>-06</sup> |
| 0051716  | cellular response to stimulus                | 1,5x10 <sup>-08</sup> | 9,9x10 <sup>-06</sup> |
| 0043068  | positive regulation of programmed cell death | 1,6x10 <sup>-08</sup> | 1,0x10 <sup>-05</sup> |
| 0044281  | small molecule metabolic process             | 1,8x10 <sup>-08</sup> | 1,1x10 <sup>-05</sup> |
| 0002684  | positive regulation of immune system process | 1,9x10 <sup>-08</sup> | 1,1x10 <sup>-05</sup> |
| 0009725  | response to hormone                          | 2,3x10 <sup>-08</sup> | 1,3x10 <sup>-05</sup> |
| 0043065  | positive regulation of apoptotic process     | 2,3x10 <sup>-08</sup> | 1,3x10 <sup>-05</sup> |
| 0009719  | response to endogenous stimulus              | 2,9x10 <sup>-08</sup> | 1,5x10 <sup>-05</sup> |
| 1901700  | response to oxygen-containing compound       | 3,4x10 <sup>-08</sup> | 1,7x10 <sup>-05</sup> |
| 0048519  | negative regulation of biological process    | 3,7x10 <sup>-08</sup> | 1,8x10 <sup>-05</sup> |
| 0071702  | organic substance transport                  | 4,6x10 <sup>-08</sup> | 2,1x10 <sup>-05</sup> |
| 0044248  | cellular catabolic process                   | 4,7x10 <sup>-08</sup> | 2,1x10 <sup>-05</sup> |
| 0009987  | cellular process                             | 5,1x10 <sup>-08</sup> | 2,2x10 <sup>-05</sup> |
| 0050776  | regulation of immune response                | 5,5x10 <sup>-08</sup> | 2,3x10 <sup>-05</sup> |
| 0033554  | cellular response to stress                  | 6,3x10 <sup>-08</sup> | 2,5x10 <sup>-05</sup> |
| 0006629  | lipid metabolic process                      | 6,2x10 <sup>-08</sup> | 2,6x10 <sup>-05</sup> |
| 0008202  | steroid metabolic process                    | 6,9x10 <sup>-08</sup> | 2,7x10 <sup>-05</sup> |
| 0009056  | catabolic process                            | 8,9x10 <sup>-08</sup> | 3,4x10 <sup>-05</sup> |
| 0006955  | immune response                              | 1,1x10 <sup>-07</sup> | 3,9x10 <sup>-05</sup> |
| 0044237  | cellular metabolic process                   | 1,4x10 <sup>-07</sup> | 5,0x10 <sup>-05</sup> |
| 0042493  | response to drug                             | 1,5x10 <sup>-07</sup> | 5,2x10 <sup>-05</sup> |
| 0044699  | single-organism process                      | 1,8x10 <sup>-07</sup> | 5,8x10 <sup>-05</sup> |

|         |                                         |                       |                       |
|---------|-----------------------------------------|-----------------------|-----------------------|
| 1901698 | response to nitrogen compound           | $1,7 \times 10^{-07}$ | $5,9 \times 10^{-05}$ |
| 0007584 | response to nutrient                    | $2,5 \times 10^{-07}$ | $8,0 \times 10^{-05}$ |
| 0048523 | negative regulation of cellular process | $2,5 \times 10^{-07}$ | $8,1 \times 10^{-05}$ |
| 0097305 | response to alcohol                     | $2,7 \times 10^{-07}$ | $8,2 \times 10^{-05}$ |
| 0010243 | response to organonitrogen compound     | $3,1 \times 10^{-07}$ | $9,2 \times 10^{-05}$ |
| 0015671 | oxygen transport                        | $3,1 \times 10^{-07}$ | $9,2 \times 10^{-05}$ |
